# Supplementary material for: The protonated and sodiated dimers of proline studied by IRMPD spectroscopy in the N–H and O–H stretching region and computational methods
Source: Royal Society of Chemistry journal article supplement (doi:10.1039/c4cp03104k), 2014-01-01
Supplement: c4cp03104k1.pdf [file c4cp03104k1.pdf]

Table S1. Table of relative Gibbs Energies and Enthalpies (298 K, in  $\text{kJ mol}^{-1}$ ) for the different proton-bound proline dimer isomers.

| Structure | $\Delta_{\text{rel}}G(\Delta_{\text{rel}}H)$<br>B3LYP/<br>6-31+G(d,p) | $\Delta_{\text{rel}}G(\Delta_{\text{rel}}H)$<br>B3LYP/<br>6-311+G(3df,3pd)//<br>B3LYP/<br>6-31+G(d,p) | $\Delta_{\text{rel}}G(\Delta_{\text{rel}}H)$<br>MP2/<br>6-311+G(3df,3pd)//<br>B3LYP/6-<br>31+G(d,p) | $\Delta_{\text{rel}}G(\Delta_{\text{rel}}H)$<br>B3LYP/<br>6-311+G(3df,3pd) | $\Delta_{\text{rel}}G(\Delta_{\text{rel}}H)$<br>MP2/<br>6-31+G(d,p) | $\Delta_{\text{rel}}G(\Delta_{\text{rel}}H)$<br>MP2/<br>6-311+G(3df,3pd)//<br>MP2/6-31+G(d,p) | $\Delta_{\text{rel}}G(\Delta_{\text{rel}}H)$<br>B3LYP-D3/<br>6-31+G(d,p) | $\Delta_{\text{rel}}G(\Delta_{\text{rel}}H)$<br>B3LYP-D3/<br>6-311+G(3df,3pd)//<br>B3LYP-D3/<br>6-31+G(d,p) |
|-----------|-----------------------------------------------------------------------|-------------------------------------------------------------------------------------------------------|-----------------------------------------------------------------------------------------------------|----------------------------------------------------------------------------|---------------------------------------------------------------------|-----------------------------------------------------------------------------------------------|--------------------------------------------------------------------------|-------------------------------------------------------------------------------------------------------------|
| ZW1       | 0.0(0.0)                                                              | 0.0(0.0)                                                                                              | 0.0(0.0)                                                                                            | 0.0(0.0)                                                                   | 0.0(0.0)                                                            | 0.0(0.0)                                                                                      | 0.0(0.0)                                                                 | 0.0(0.0)                                                                                                    |
| ZW2       | 1.9(-0.1)                                                             | 1.7(-1.4)                                                                                             | 1.3(-0.7)                                                                                           | 1.7(-0.4)                                                                  | 2.6(0.5)                                                            | 1.8(-0.3)                                                                                     | 1.7(-0.1)                                                                | 1.7(-0.1)                                                                                                   |
| ZW3       | 2.1(3.7)                                                              | 2.0(3.6)                                                                                              | 2.7(4.3)                                                                                            | -0.3(1.7)                                                                  | 1.6(3.6)                                                            | 1.3(3.3)                                                                                      | 4.8(3.5)                                                                 | 4.9(3.7)                                                                                                    |
| ZW4       | 7.3(9.6)                                                              | 7.3(9.6)                                                                                              | 3.7(6.0)                                                                                            | 7.4(9.7)                                                                   | 0.8(3.1)                                                            | 0.6(2.8)                                                                                      | 9.9(5.6)                                                                 | 9.8(5.5)                                                                                                    |
| ZW5       | 2.3(3.0)                                                              | 2.4(3.1)                                                                                              | 4.9(5.6)                                                                                            | 2.4(3.1)                                                                   | 4.0(4.7)                                                            | 5.4(6.1)                                                                                      | 5.2(4.7)                                                                 | 4.9(4.4)                                                                                                    |
| ZW6       | 3.4(5.4)                                                              | 3.3(5.2)                                                                                              | 6.8(8.8)                                                                                            | 3.2(5.2)                                                                   | 6.6(8.6)                                                            | 7.8(9.8)                                                                                      | 6.5(7.5)                                                                 | 6.5(7.5)                                                                                                    |
| CS7       | 7.2(8.6)                                                              | 4.9(6.4)                                                                                              | 7.5(9.0)                                                                                            | 4.9(6.3)                                                                   | 13.6(15.1)                                                          | 8.0(9.4)                                                                                      | 9.6(9.2)                                                                 | 11.6(11.1)                                                                                                  |
| ZW8       | 9.9(9.8)                                                              | 10.6(10.4)                                                                                            | 9.5(9.3)                                                                                            | 10.5(10.4)                                                                 | 6.1(5.9)                                                            | 7.3(7.2)                                                                                      | 10.7(7.6)                                                                | 10.2(7.1)                                                                                                   |
| CS9       | 8.1(10.8)                                                             | 5.6(8.3)                                                                                              | 9.7(12.4)                                                                                           | 5.5(8.2)                                                                   | 15.6(18.3)                                                          | 10.6(13.3)                                                                                    | 12.4(12.1)                                                               | 14.7(14.3)                                                                                                  |
| ZW10      | 9.9(9.7)                                                              | 10.6(10.4)                                                                                            | 9.9(9.7)                                                                                            | 10.7(10.4)                                                                 | 6.1(5.8)                                                            | 7.4(7.1)                                                                                      | 10.7(7.6)                                                                | 10.2(7.1)                                                                                                   |
| CS11      | 8.4(10.3)                                                             | 5.8(7.6)                                                                                              | 10.0(11.9)                                                                                          |                                                                            |                                                                     |                                                                                               |                                                                          |                                                                                                             |
| ZW12      | 8.7(11.9)                                                             | 9.4(12.6)                                                                                             | 10.0(13.3)                                                                                          |                                                                            |                                                                     |                                                                                               |                                                                          |                                                                                                             |
| CS13      | 7.4(11.0)                                                             | 5.1(8.7)                                                                                              | 10.2(13.7)                                                                                          |                                                                            |                                                                     |                                                                                               |                                                                          |                                                                                                             |
| CS14      | 8.6(10.8)                                                             | 6.0(8.2)                                                                                              | 10.4(12.6)                                                                                          |                                                                            |                                                                     |                                                                                               |                                                                          |                                                                                                             |

|      |            |            |            |  |  |  |  |  |
|------|------------|------------|------------|--|--|--|--|--|
| CS15 | 11.2(12.3) | 11.7(12.8) | 10.5(11.6) |  |  |  |  |  |
| CS16 | 7.4(11.7)  | 4.9(9.2)   | 11.0(15.3) |  |  |  |  |  |
| ZW17 | 14.4(15.9) | 14.8(16.3) | 12.4(13.9) |  |  |  |  |  |
| ZW18 | 12.1(13.0) | 12.9(13.9) | 15.2(16.2) |  |  |  |  |  |
| ZW19 | 13.7(15.0) | 14.6(16.0) |            |  |  |  |  |  |
| ZW20 | 18.0(16.9) | 19.2(18.1) |            |  |  |  |  |  |
| ZW21 | 12.9(19.6) | 13.8(20.8) |            |  |  |  |  |  |
| ZW22 | 15.0(14.8) |            |            |  |  |  |  |  |
| CS23 | 18.4(24.8) |            |            |  |  |  |  |  |
| CS24 | 21.9(27.0) |            |            |  |  |  |  |  |
| CS25 | 21.6(27.9) |            |            |  |  |  |  |  |
| ZW26 | 21.6(27.9) |            |            |  |  |  |  |  |
| CS27 | 22.0(29.3) |            |            |  |  |  |  |  |
| CS28 | 22.2(27.1) |            |            |  |  |  |  |  |
| CS29 | 23.5(27.2) |            |            |  |  |  |  |  |
| CS30 | 24.0(28.8) |            |            |  |  |  |  |  |
| ZW31 | 25.3(26.1) |            |            |  |  |  |  |  |
| CS32 | 25.7(30.5) |            |            |  |  |  |  |  |

|      |            |  |  |  |  |  |  |  |
|------|------------|--|--|--|--|--|--|--|
| ZW33 | 25.8(29.4) |  |  |  |  |  |  |  |
| ZW34 | 26.9(29.2) |  |  |  |  |  |  |  |
| ZW35 | 30.1(28.4) |  |  |  |  |  |  |  |
| ZW36 | 32.1(29.8) |  |  |  |  |  |  |  |
| CS37 | 32.3(37.9) |  |  |  |  |  |  |  |
| ZW38 | 35.1(32.3) |  |  |  |  |  |  |  |
| ZW39 | 40.5(38.4) |  |  |  |  |  |  |  |
| ZW40 | 42.6(42.0) |  |  |  |  |  |  |  |
| ZW41 | 49.1(52.0) |  |  |  |  |  |  |  |
| ZW42 | 55.6(51.9) |  |  |  |  |  |  |  |

Table S2. Table of relative Gibbs Energies and Enthalpies (298 K, in kJ mol<sup>-1</sup>) for the different sodium-bound proline dimer isomers.

| Structure | $\Delta_{\text{rel}}G(\Delta_{\text{rel}}H)$<br>B3LYP/<br>6-31+G(d,p) | $\Delta_{\text{rel}}G(\Delta_{\text{rel}}H)$<br>B3LYP/<br>6-311+G(3df,3pd)//<br>B3LYP/<br>6-31+G(d,p) | $\Delta_{\text{rel}}G(\Delta_{\text{rel}}H)$<br>B3LYP/<br>6-311+G(3df,3pd) | $\Delta_{\text{rel}}G(\Delta_{\text{rel}}H)$<br>MP2/<br>6-31+G(d,p) | $\Delta_{\text{rel}}G(\Delta_{\text{rel}}H)$<br>MP2/<br>6-311+G(3df,3pd)//<br>MP2/6-31+G(d,p) | $\Delta_{\text{rel}}G(\Delta_{\text{rel}}H)$<br>B3LYP-D3/<br>6-31+G(d,p) | $\Delta_{\text{rel}}G(\Delta_{\text{rel}}H)$<br>B3LYP-D3/<br>6-311+G(3df,3pd)//<br>B3LYP-D3/<br>6-31+G(d,p) |
|-----------|-----------------------------------------------------------------------|-------------------------------------------------------------------------------------------------------|----------------------------------------------------------------------------|---------------------------------------------------------------------|-----------------------------------------------------------------------------------------------|--------------------------------------------------------------------------|-------------------------------------------------------------------------------------------------------------|
| ZW-CS1    | 0.0(0.0)                                                              | 0.0(0.0)                                                                                              | 0.0(0.0)                                                                   | 0.0(0.0)                                                            | 0.0(0.0)                                                                                      | 3.4(5.8)                                                                 | 2.9(5.3)                                                                                                    |
| ZW-ZW2    | -1.0(-5.9)                                                            | 1.6(-3.3)                                                                                             | 1.6(-3.3)                                                                  | -9.0(-13.9)                                                         | 2.2(-0.6)                                                                                     | 4.4(2.0)                                                                 | 1.5(-0.9)                                                                                                   |
| ZW-CS3    | 1.9(3.8)                                                              | 2.5(4.5)                                                                                              | 0.6(2.5)                                                                   | 2.2(4.1)                                                            | 3.6(5.5)                                                                                      | 7.8(10.0)                                                                | 7.2(9.5)                                                                                                    |
| ZW-CS4    | 3.5(-0.8)                                                             | 3.1(-1.2)                                                                                             | 3.1(-1.2)                                                                  | 1.0(-3.3)                                                           | 4.9(0.6)                                                                                      | 0.0(0.0)                                                                 | 0.0(0.0)                                                                                                    |
| ZW-CS5    | 2.9(-1.6)                                                             | 3.6(-0.9)                                                                                             | 1.6(-3.3)                                                                  | 1.0(-3.5)                                                           | 1.9(-2.6)                                                                                     | 2.0(2.7)                                                                 | 1.4(2.1)                                                                                                    |
| ZW-CS6    | 6.1(0.4)                                                              | 3.7(-1.9)                                                                                             | 7.7(2.1)                                                                   | 4.2(-1.4)                                                           | 8.1(2.5)                                                                                      | 1.3(1.9)                                                                 | 1.5(2.1)                                                                                                    |
| ZW-ZW7    | 1.3(-6.5)                                                             | 3.8(-3.8)                                                                                             | 3.8(-3.9)                                                                  | -6.6(-14.4)                                                         | 0.8(-6.9)                                                                                     | 6.6(1.3)                                                                 | 3.8(-1.6)                                                                                                   |
| ZW-ZW8    | 6.1(0.4)                                                              | 4.9(-0.7)                                                                                             | 8.2(2.8)                                                                   | -3.0(-8.4)                                                          | 6.0(0.5)                                                                                      | 7.8(7.0)                                                                 | 4.7(3.9)                                                                                                    |
| ZW-ZW9    | 2.5(-3)                                                               | 5.3(-0.2)                                                                                             | 7.5(2.0)                                                                   | -3.7(-9.2)                                                          | 5.3(-0.2)                                                                                     | 2.3(-0.6)                                                                | 2.5(-0.4)                                                                                                   |
| ZW-CS10   | 6.8(1.5)                                                              | 6.2(0.9)                                                                                              |                                                                            |                                                                     |                                                                                               | 7.6(4.0)                                                                 | 4.5(3.0)                                                                                                    |
| ZW-CS11   | 7.4(6.3)                                                              | 6.8(5.7)                                                                                              |                                                                            |                                                                     |                                                                                               |                                                                          |                                                                                                             |
| ZW-CS12   | 8.2(2.7)                                                              | 7.9(2.4)                                                                                              | 10.1(4.6)                                                                  | 7.1(1.6)                                                            | 12.5(6.9)                                                                                     |                                                                          |                                                                                                             |
| ZW-CS13   | 8.3(3.7)                                                              | 8.0(3.4)                                                                                              |                                                                            |                                                                     |                                                                                               |                                                                          |                                                                                                             |
| ZW-CS14   | 9.3(4.8)                                                              | 8.9(4.3)                                                                                              |                                                                            |                                                                     |                                                                                               |                                                                          |                                                                                                             |

|         |            |            |           |           |           |  |  |
|---------|------------|------------|-----------|-----------|-----------|--|--|
| ZWZW15  | 6.5(0.9)   | 9.4(3.9)   |           |           |           |  |  |
| ZWZW16  | 8.0(1.6)   | 10.9(4.5)  | 13.1(6.7) | 3.5(-2.8) | 14.1(7.7) |  |  |
| ZW-CS17 | 12.0(0.8)  | 11.2(0.0)  |           |           |           |  |  |
| CS-CS18 | 12.4(11.1) | 11.5(10.1) |           |           |           |  |  |
| CS-CS19 | 14.2(13.4) | 13.1(12.2) |           |           |           |  |  |
| CS-CS20 | 19.8(16.1) | 16.3(12.7) |           |           |           |  |  |
| ZW-CS21 | 19.7(16.0) | 19.3(15.7) |           |           |           |  |  |
| ZW-CS22 | 20.0(15.9) | 19.6(15.5) |           |           |           |  |  |
| CS-CS23 | 23.9(18.2) | 19.9(14.1) |           |           |           |  |  |
| ZW-CS24 | 23.2(19.3) | 23.0(19.1) |           |           |           |  |  |
| ZW-CS25 | 19.5(19.2) | 23.1(19.1) |           |           |           |  |  |
| ZW-CS26 | 28.0(24.6) | 23.6(20.2) |           |           |           |  |  |
| ZW-CS27 | 27.9(24.5) | 24.0(20.7) |           |           |           |  |  |
| CS-CS28 | 28.9(27.7) | 26.6(25.5) |           |           |           |  |  |
| ZW-CS29 | 32.0(33.7) | 30.2(31.5) |           |           |           |  |  |
| ZW-CS30 | 33.9(33.9) | 31.6(31.6) |           |           |           |  |  |
| ZW-CS31 | 31.2(28.5) | 32.8(30.1) |           |           |           |  |  |
| ZW-CS32 | 42.3(37.2) | 39.3(34.2) |           |           |           |  |  |

|         |            |            |  |  |  |  |  |  |
|---------|------------|------------|--|--|--|--|--|--|
| CS-CS33 | 43.5(47.6) | 40.3(44.4) |  |  |  |  |  |  |
| ZW-CS34 | 46.9(48.3) | 41.2(42.6) |  |  |  |  |  |  |
| ZW-CS35 | 39.8(38.7) | 41.6(40.5) |  |  |  |  |  |  |
| ZW-CS36 | 40.3(38.6) | 42.0(40.3) |  |  |  |  |  |  |

Figure S1a.

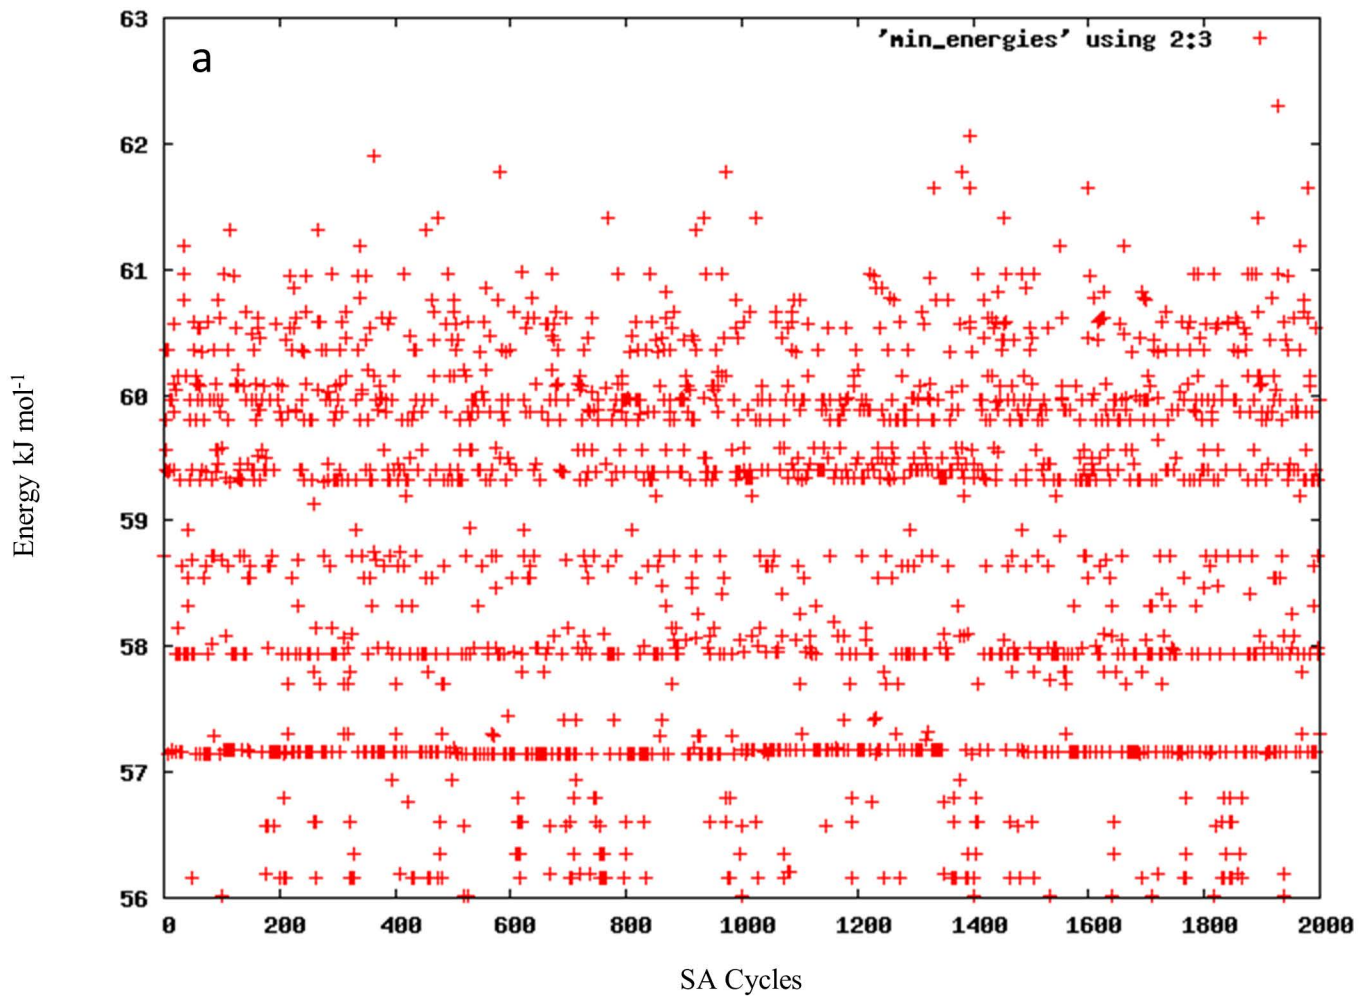

**Figure S1b.**

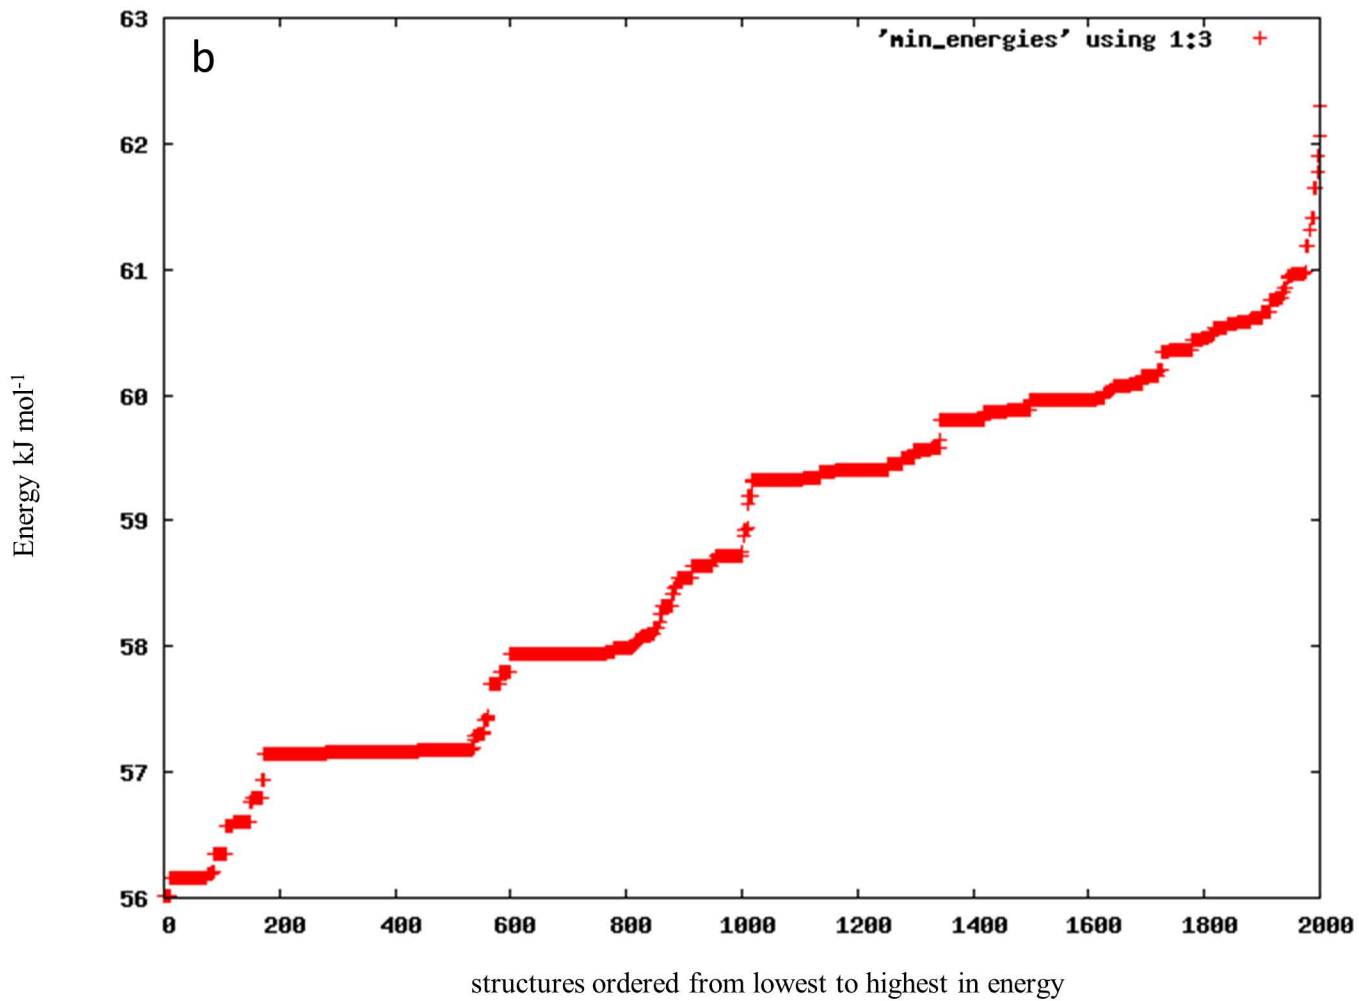

SA Cycles



Figure S2

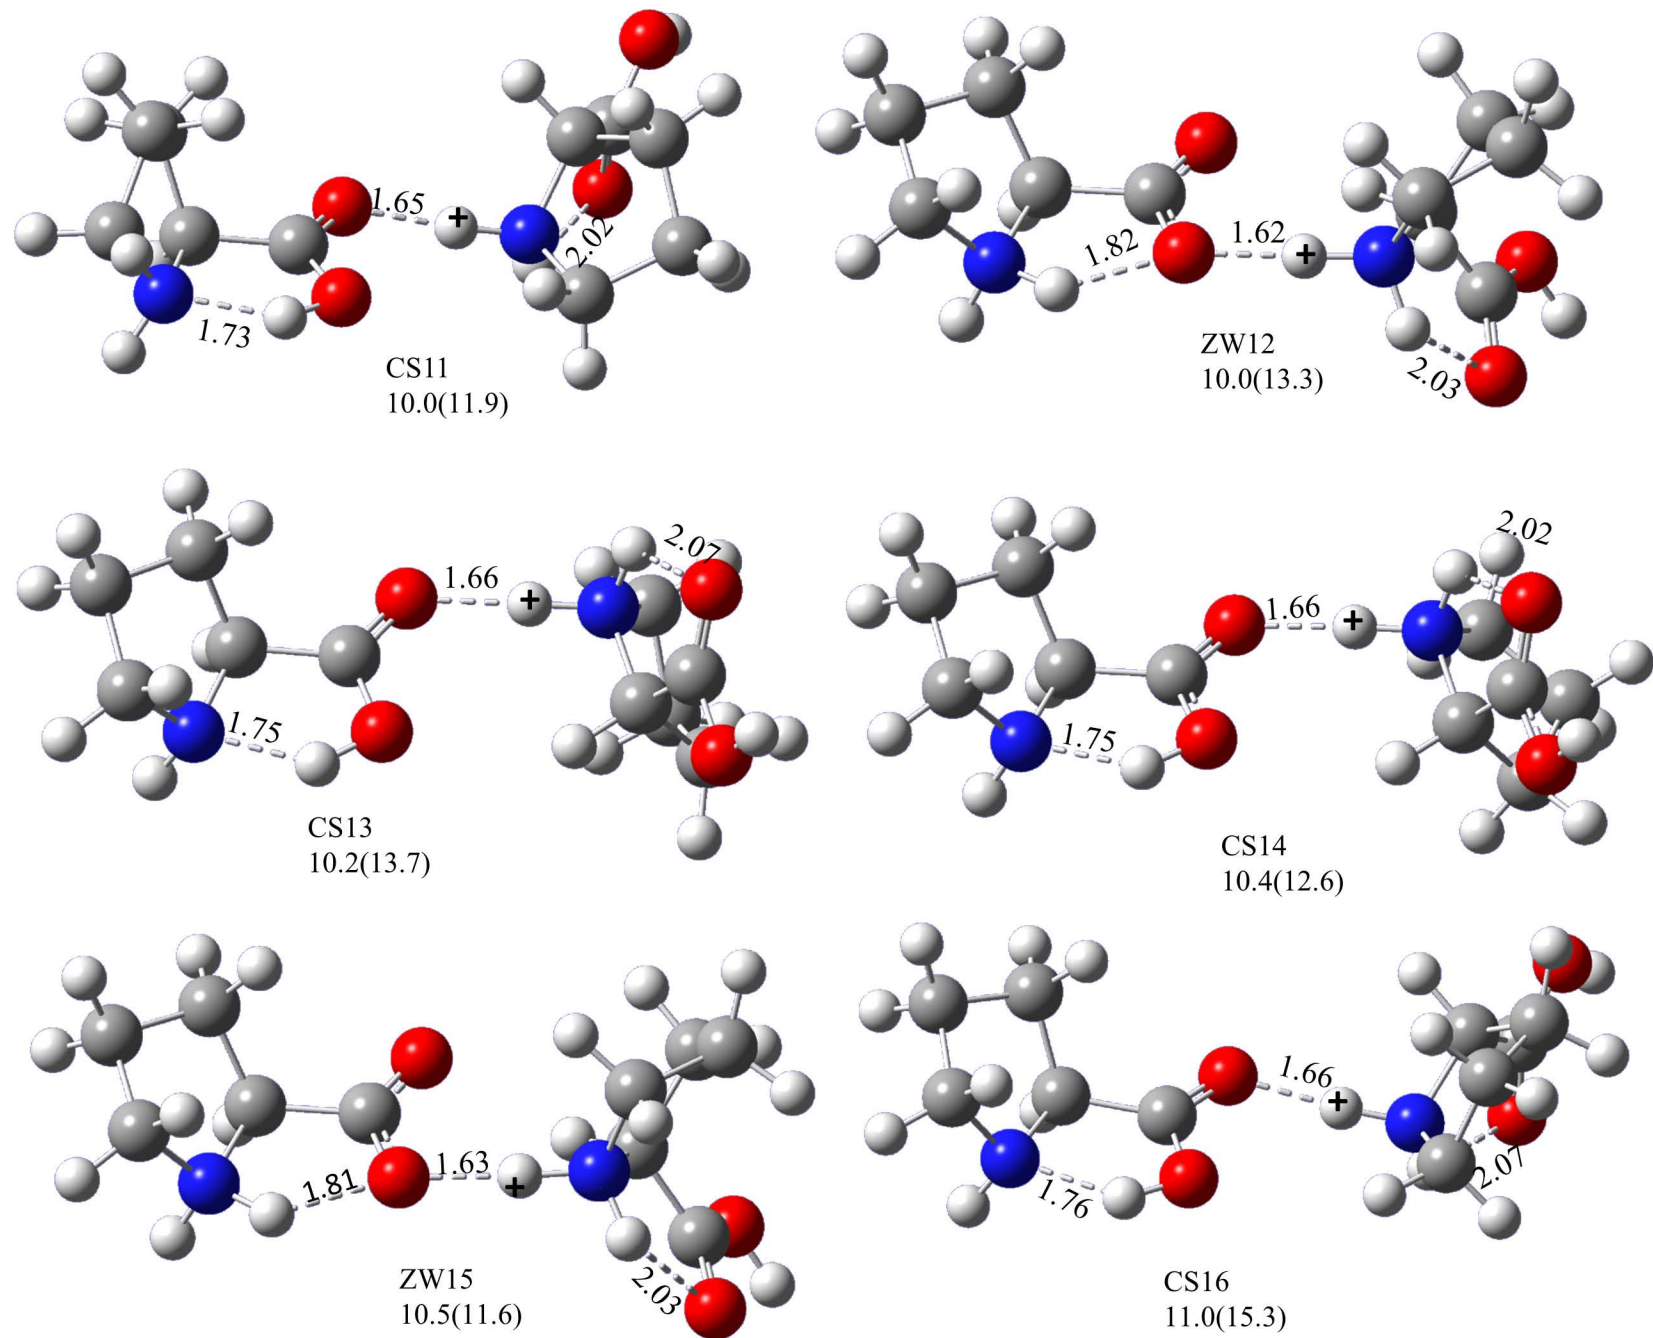

Figure S2 (cont'd)

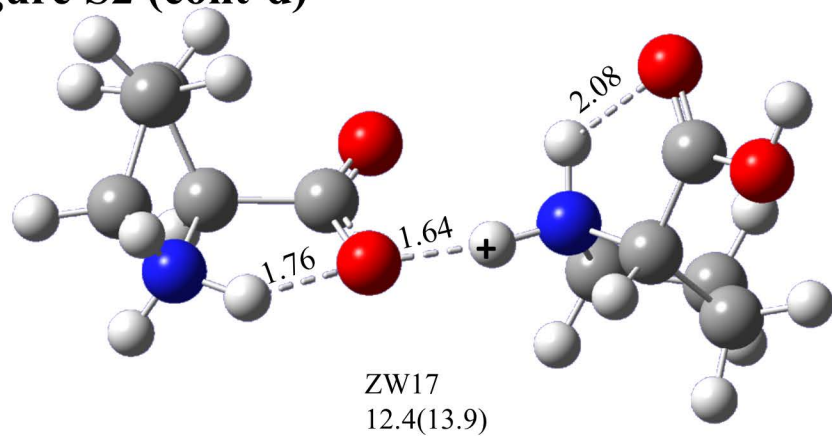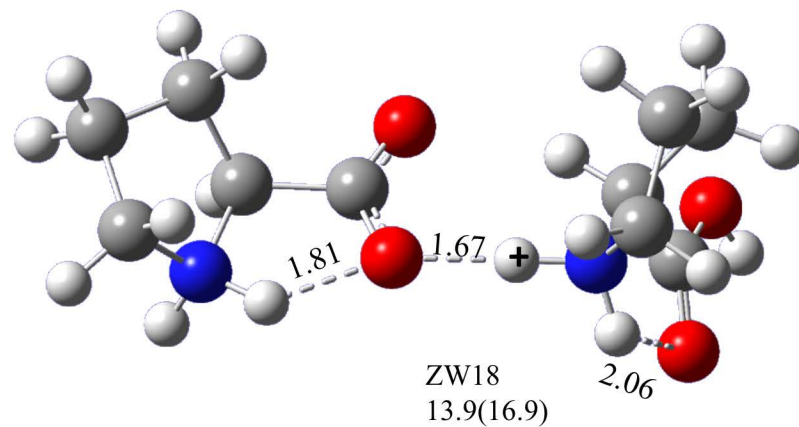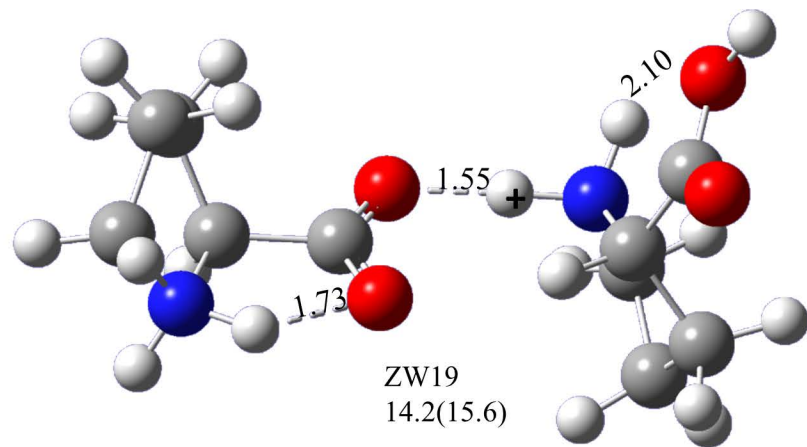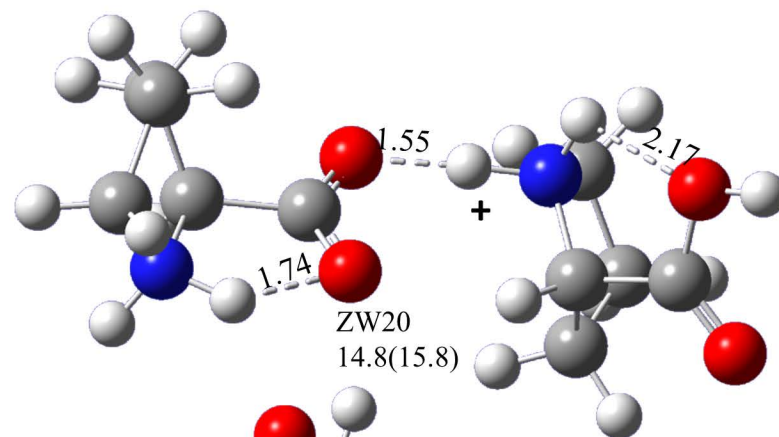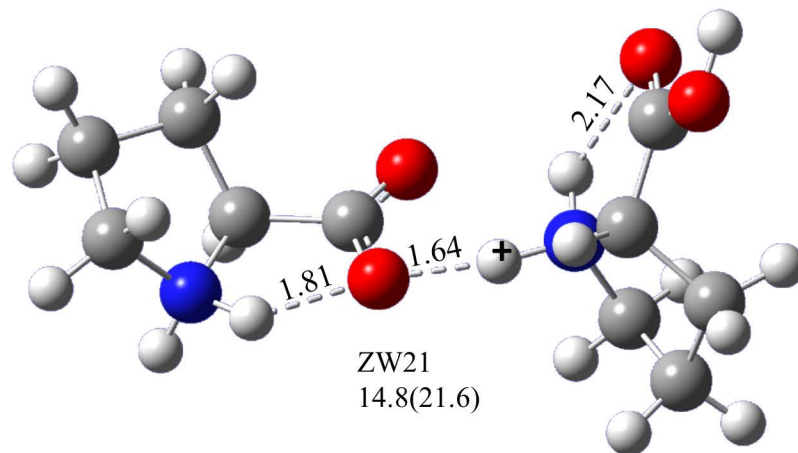

**Figure S3.** IRMPD spectrum of  $(\text{Pro})_2\text{H}^+$  investigated by McMahon and Wu in  $(1000\text{-}2000\text{cm}^{-1})$  compared with the B3LYP/6-3+G(d,p) predicted spectra for ZW1, ZW4.

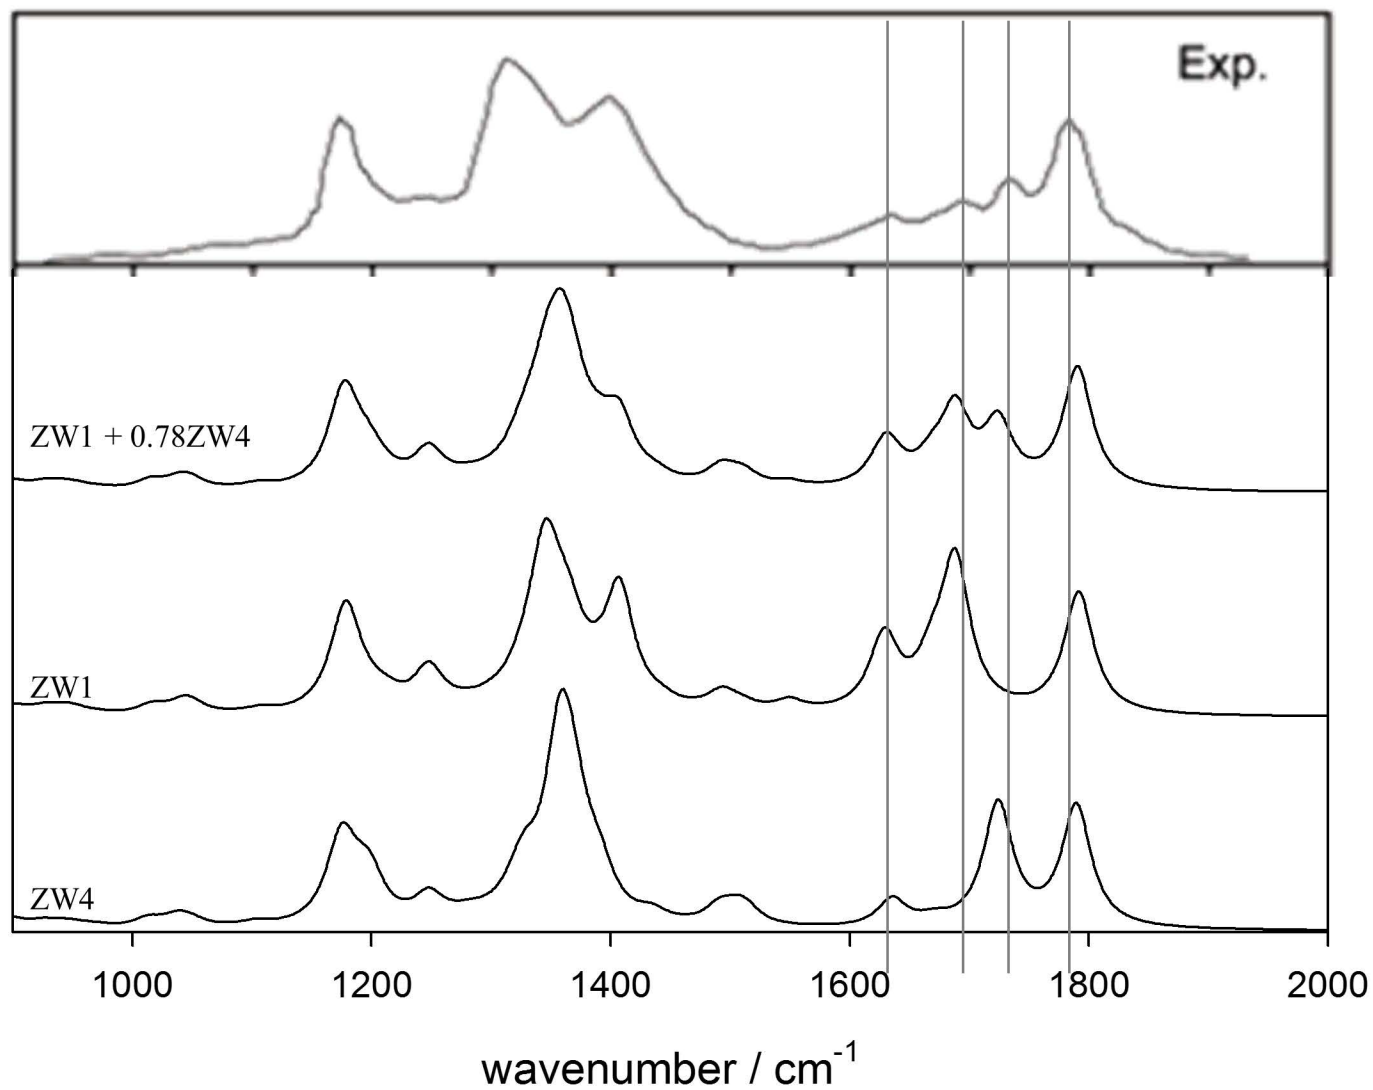

Figure S4

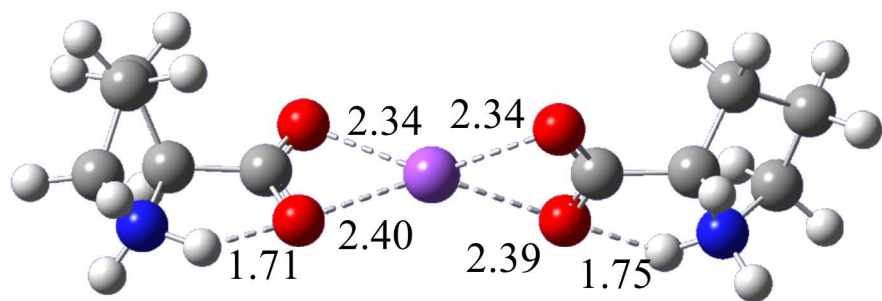

ZW-ZW9  
5.3(-0.2)

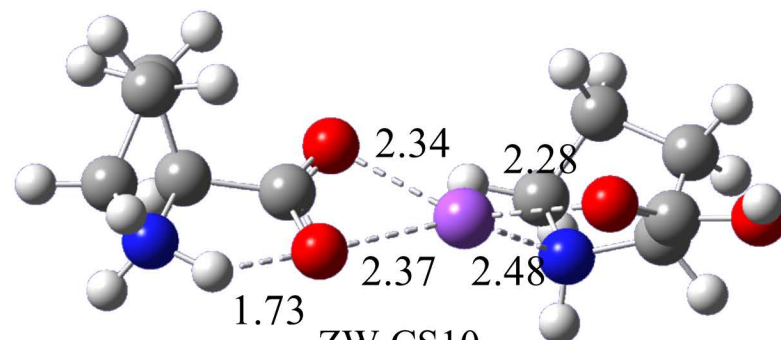

ZW-CS10  
6.2(0.9)

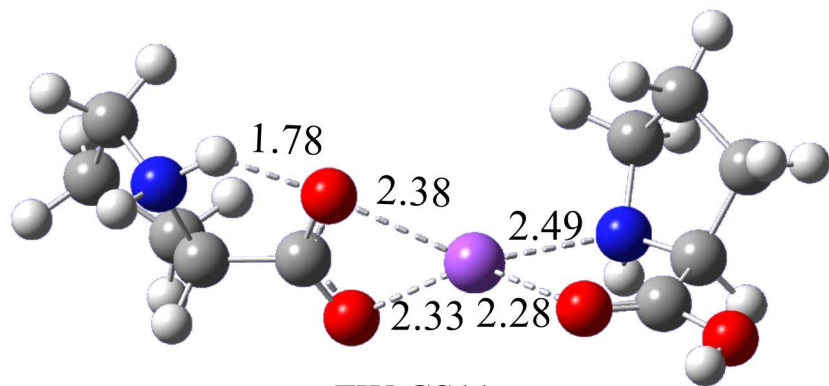

ZW-CS11  
6.8(5.7)

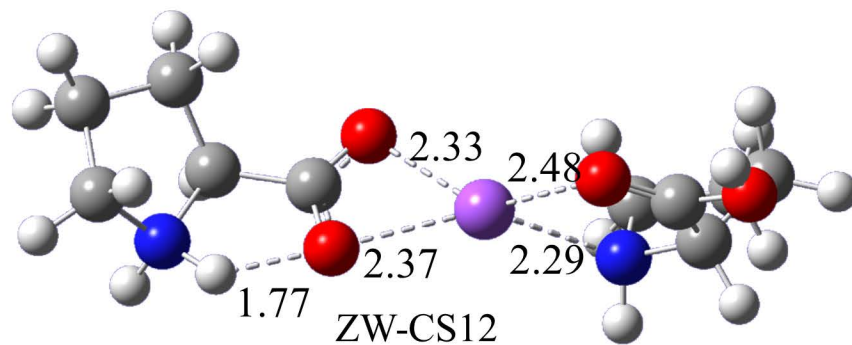

ZW-CS12  
7.9(2.4)



**Figure S4.**

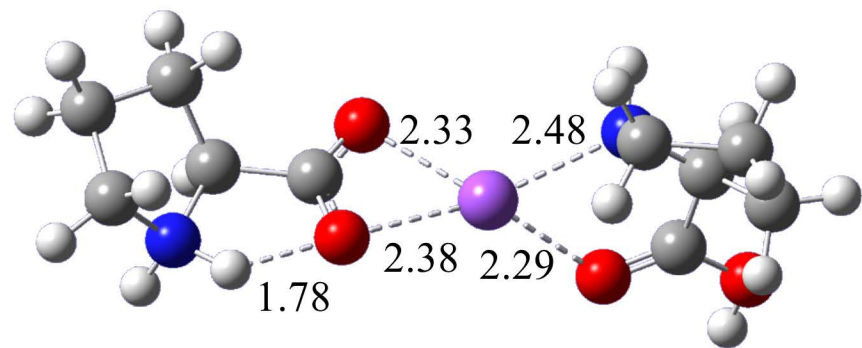

ZW-CS13  
8.0(3.4)

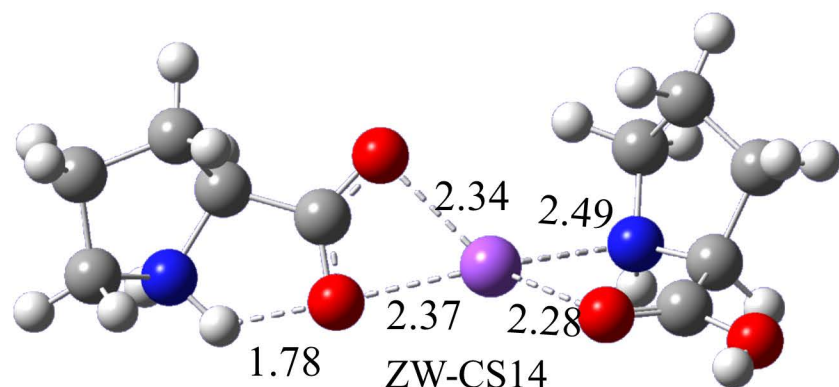

ZW-CS14  
8.9(4.3)

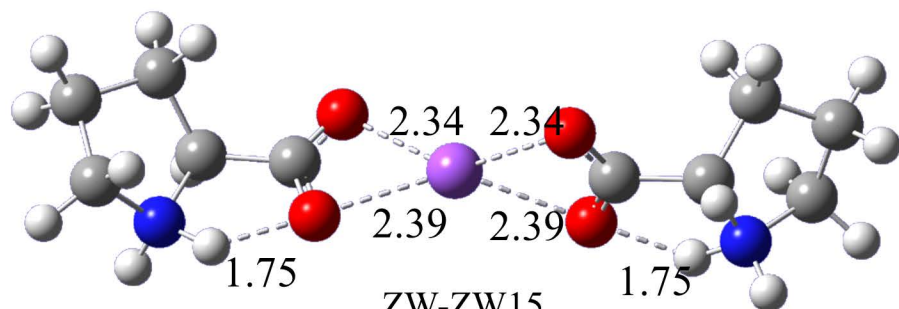

ZW-ZW15  
9.4(3.9)

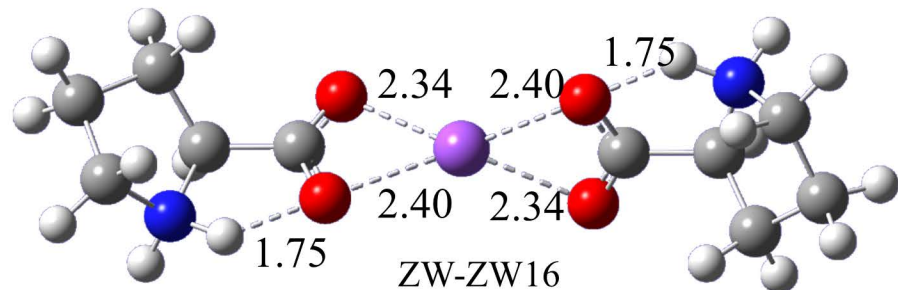

ZW-ZW16  
10.9 (4.5)

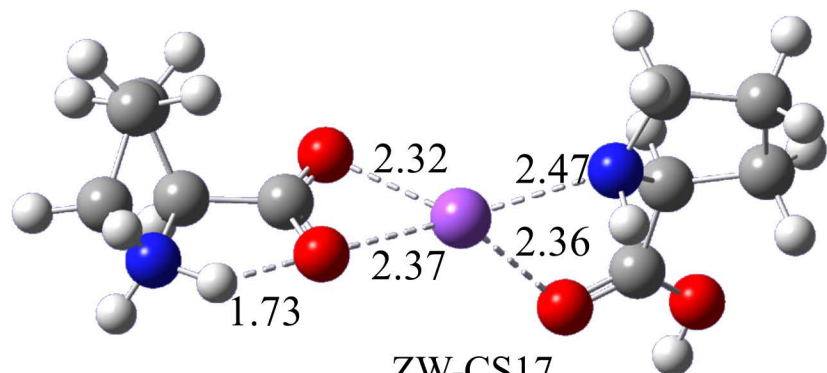

ZW-CS17  
11.2(0.0)

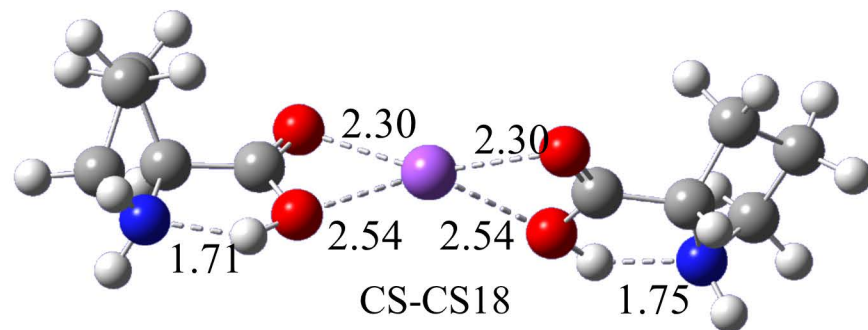

CS-CS18  
11.5(10.1)

**Figure S4 (cont'd)**

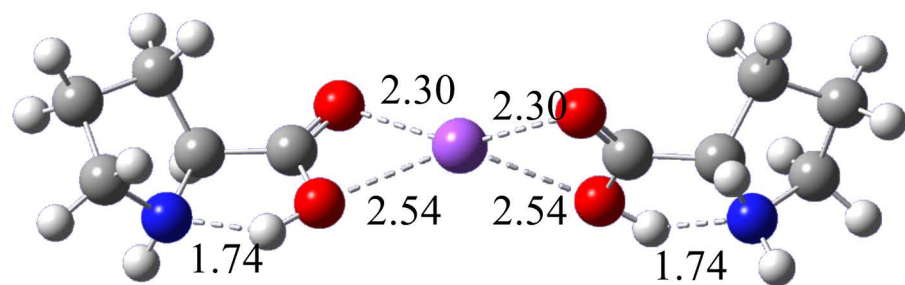

CS-CS19  
13.1(12.2)

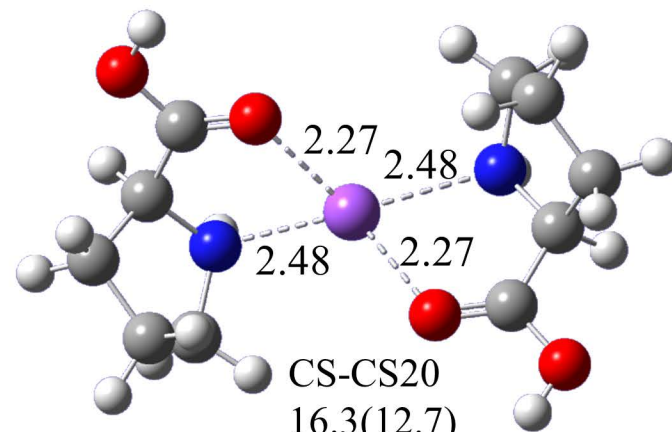

CS-CS20  
16.3(12.7)

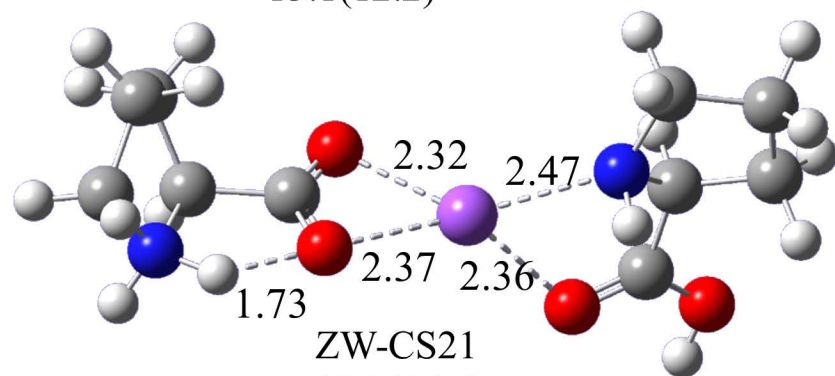

ZW-CS21  
19.3(15.7)

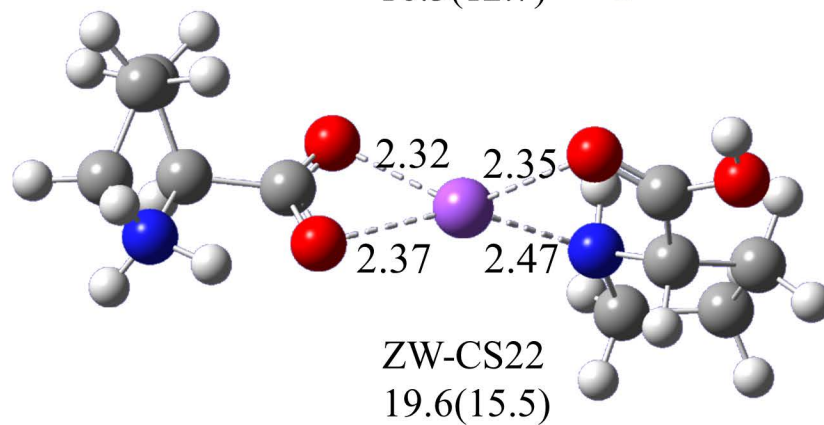

ZW-CS22  
19.6(15.5)

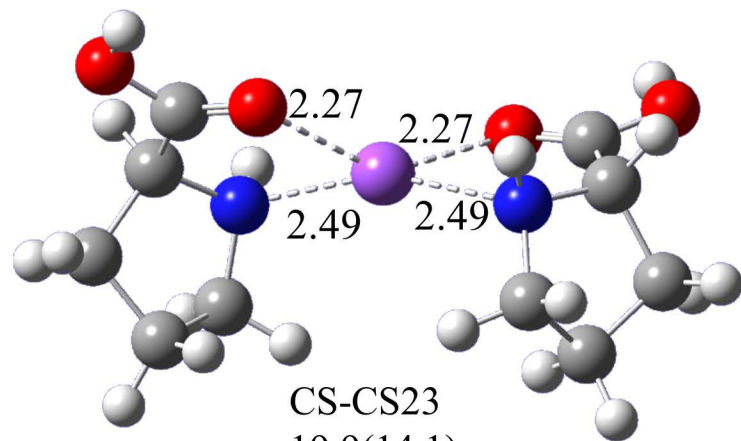

CS-CS23  
19.9(14.1)

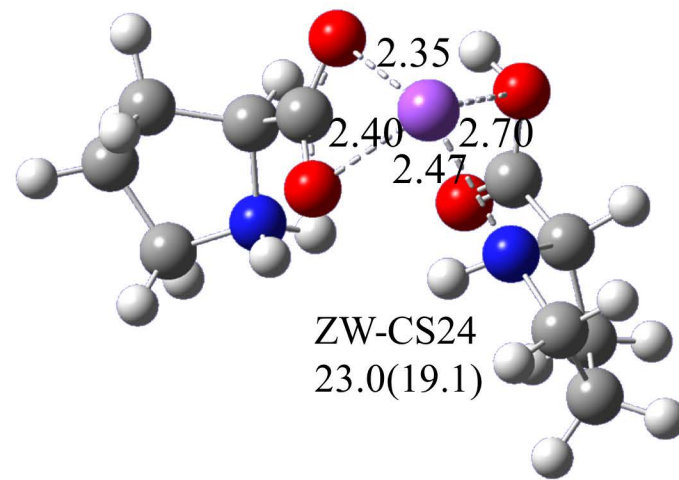

ZW-CS24  
23.0(19.1)

Figure S4 (cont'd)

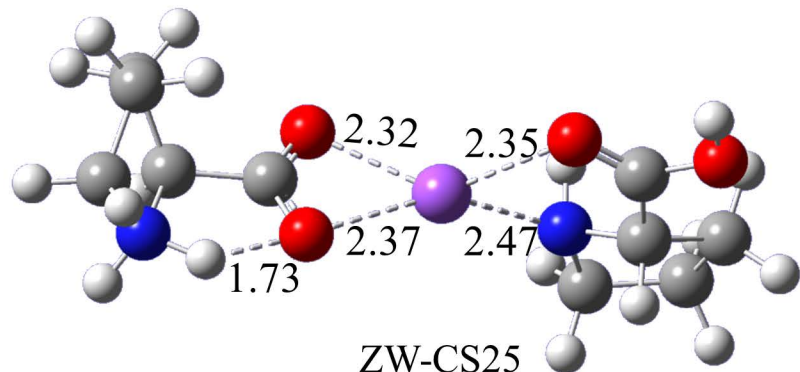

ZW-CS25  
23.1(19.1)

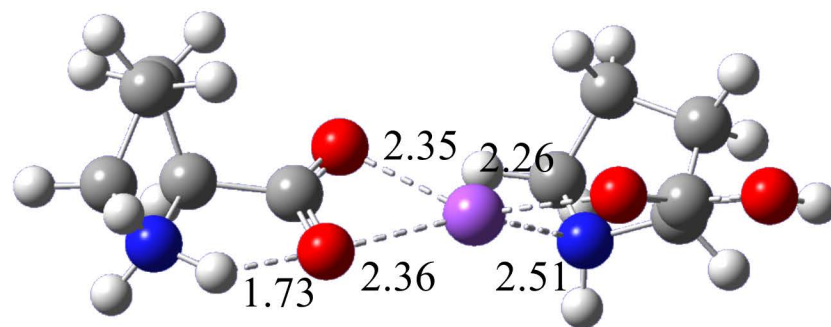

ZW-CS26  
23.6(20.2)

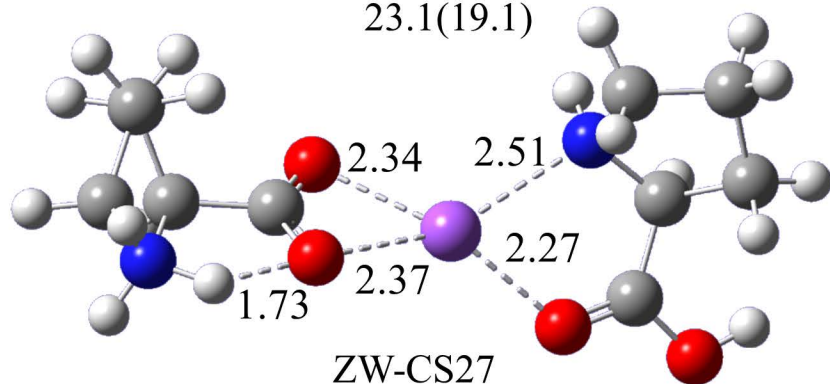

ZW-CS27  
24.0(20.7)

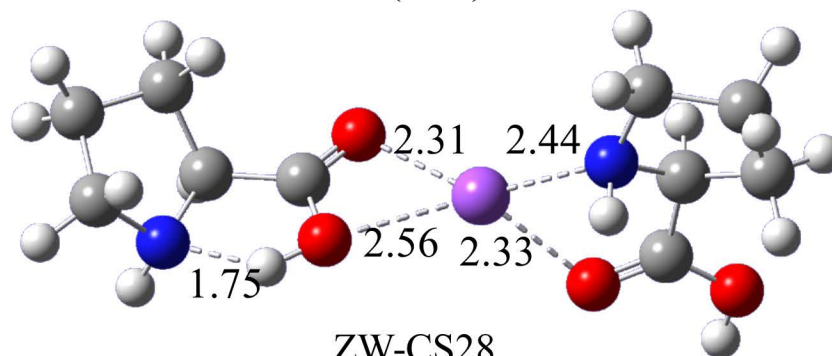

ZW-CS28  
26.6(25.5)

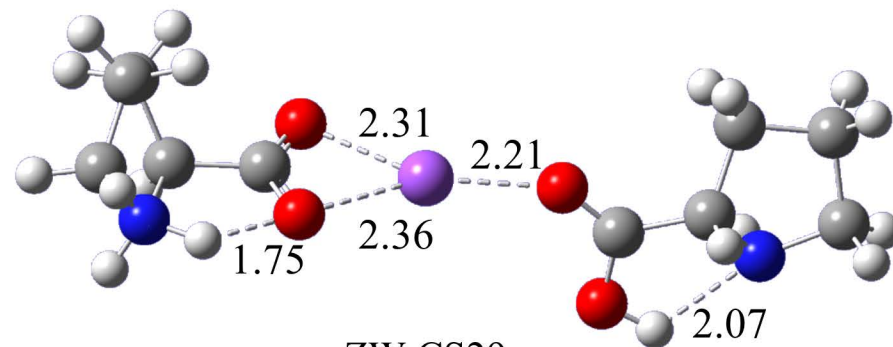

ZW-CS29  
30.2(31.5)

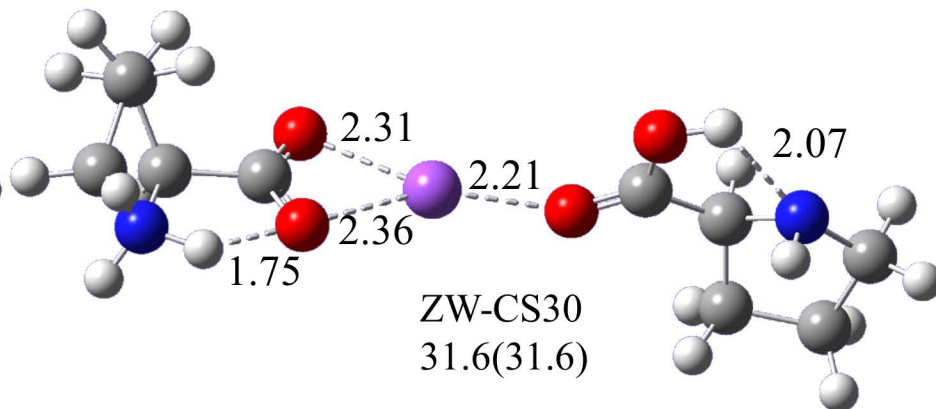

ZW-CS30  
31.6(31.6)



**Figure S4 (cont'd)**

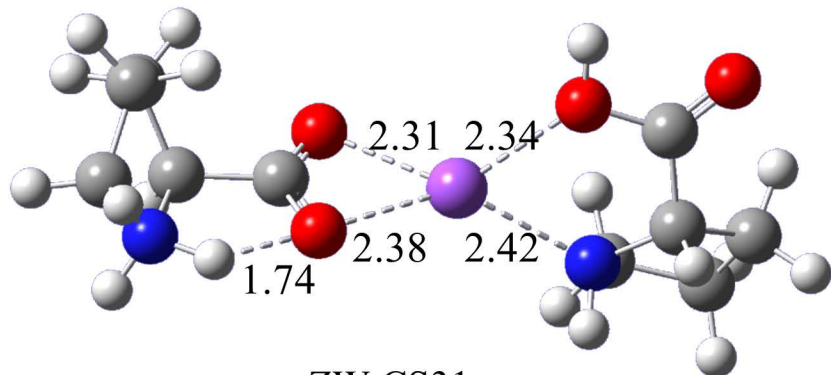

ZW-CS31  
32.8(30.1)

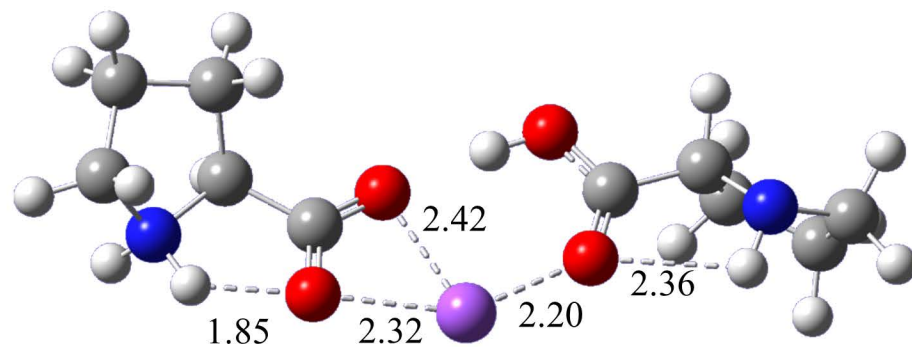

ZW-CS32  
39.3(34.2)

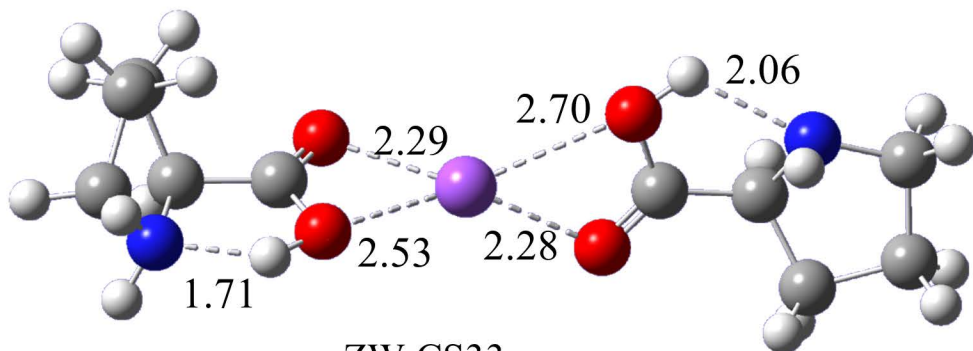

ZW-CS33  
40.3(44.4)

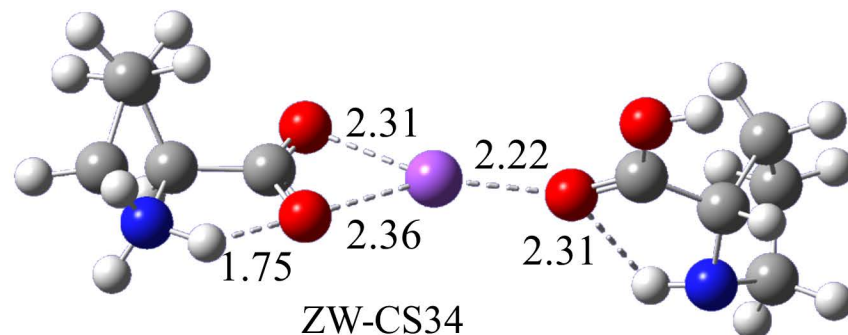

ZW-CS34  
41.2(42.6)

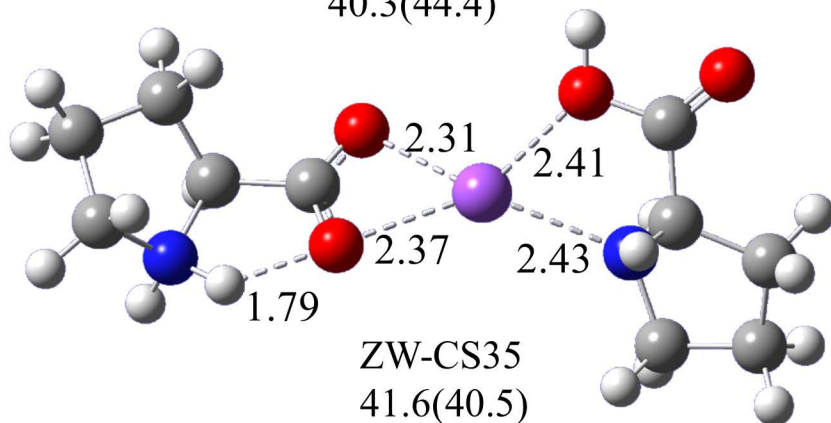

ZW-CS35  
41.6(40.5)

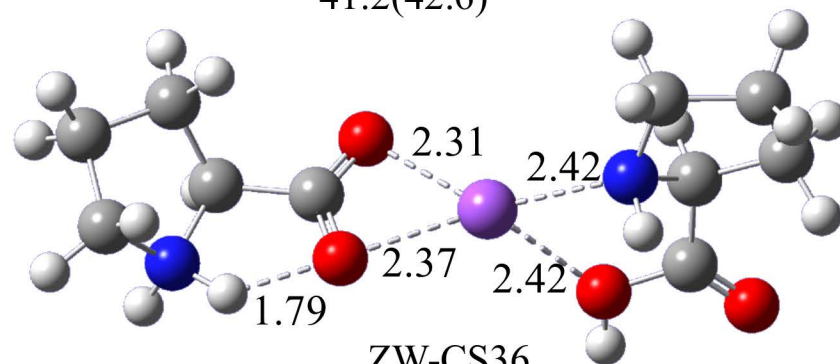

ZW-CS36  
42.0(40.3)
